# Supplementary material
Source: publisher figshare collection journal article supplement (https://karger.figshare.com/ndownloader/files/26128820)
Supplement: Supplementary file 1 [file 26128820]

## Sheet: Sheet1
Table S2. List of peptide sequences used in the study
